# Supplementary material for: Associations between Green Space Surrounding Kindergartens and Hyperactivity Behaviors among Chinese Preschool Children
Source: MDPI journal article supplement (doi:10.3390/future1010005), 2023-05-26
Supplement: s1 [file s1]

Archive with 1 entries (1 files):
- future-2239218-supplementary.pdf
