# Supplementary material for: Associations between Green Space Surrounding Kindergartens and Hyperactivity Behaviors among Chinese Preschool Children
Source: MDPI journal article supplement (doi:10.3390/future1010005), 2023-05-26
Supplement: s1 [file s1 › future-2239218-supplementary.pdf]

## Supplemental Materials

### Associations between green space surrounding kindergartens and hyperactivity behaviors among Chinese preschool children

Tentative author list:

Baozhuo Ai <sup>1</sup>, Shiyu Zhang <sup>1</sup>, Jiaying Fu <sup>1</sup>, Xiaona Yin <sup>2</sup>, Guomin Wen <sup>2</sup>, Dengli Sun <sup>2</sup>, Danxia Xian <sup>2</sup>, Yafen Zhao <sup>2</sup>, Hualiang Lin <sup>1</sup>, Weiqing Chen <sup>1,3</sup>, Weikang Yang <sup>2,\*</sup>  
and Zilong Zhang <sup>1,\*</sup>

<sup>1</sup> Department of Epidemiology, School of Public Health, Sun Yat-sen University, Guangzhou 510080, China; aibzh@mail2.sysu.edu.cn (B.A.); zhangshy78@mail2.sysu.edu.cn (S.Z.); 18781929512@163.com (J.F.); linhualiang@mail.sysu.edu.cn (H.L.); chenwq@mail.sysu.edu.cn (W.-Q.C.)

<sup>2</sup> Women's and Children's Hospital of Longhua District of Shenzhen, 68 Hua Wang Road, Shenzhen 518109, China; yinxiaona@lhfywork.com (X.-N.Y.); 13923453902@163.com (G.-M.W.); sundengli@lhfywork.com (D.-L.S.); xiandanxia@163.com (D.-X.X.); zhaoyafen@lhfywork.com (Y.-F.Z.)

<sup>3</sup> Department of Health, School of Health Management, Xinhua College of Guangzhou, Guangzhou 510520, China

## **Figure of contents**

Figure S1 Directed acyclic graph for the association between greenness and hyperactivity behaviors.

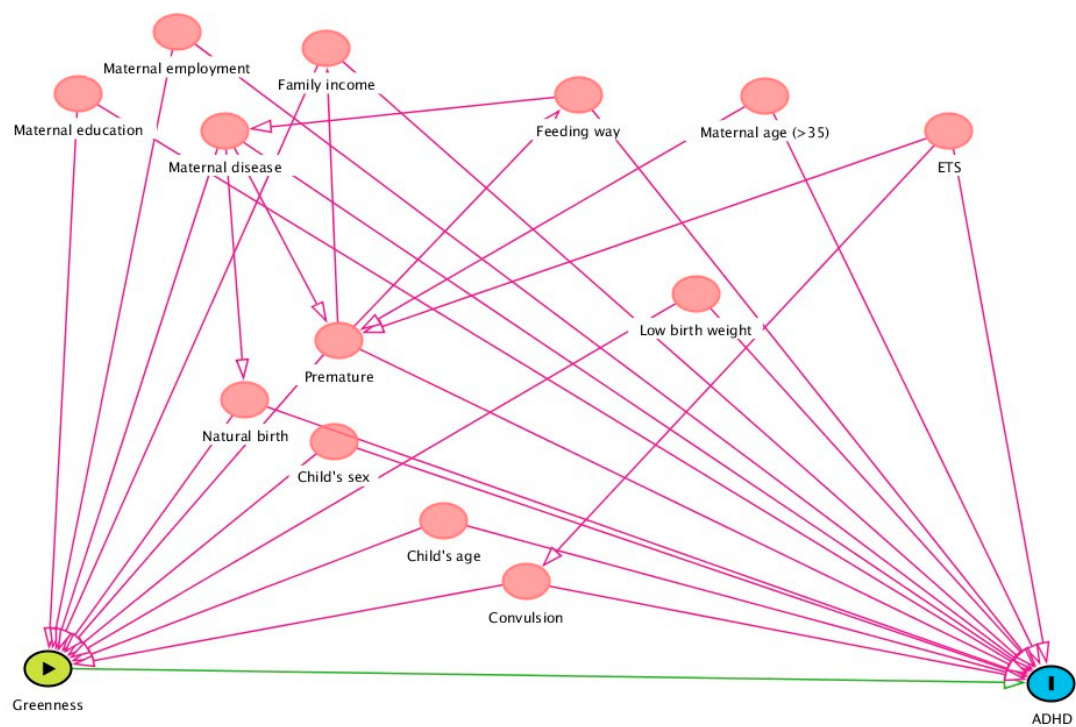

Figure S1 Directed acyclic graph for the association between greenness and hyperactivity behaviors.

## Table of contents

Table S1. Summary of epidemiological studies of associations between school-based greenness and ADHD/hyperactivity behaviors.

Table S2. Characteristics of the study samples

Table S3. Summary of greenness indices and correlations between NDVI and EVI.

Table S4. Factors at each hierarchical level in regression analysis

Table S5. Odds ratios (OR) and 95% CI for the effect of baseline NDVI on hyperactivity behaviors in young children.

Table S6.  $\beta$  and 95% CI for the effect of baseline NDVI on hyperactivity index.

Table S7. Odds ratios (OR) and 95% CI for the effect of baseline EVI on hyperactivity behaviors.

Table S8. Odds ratios (OR) and 95% CI for the effect of baseline NDVI on hyperactivity behaviors additionally adjusted NO<sub>2</sub>.

Table S1. Summary of epidemiological studies of associations between school-based greenness and ADHD/hyperactivity behaviors.

| Authors, year<br>[reference]         | Study-<br>design             | Country        | Population                                      | Green exposure<br>metrics                                                                | Outcome metrics                                                                                                                                                                | Main findings                                                                                                                                                                                                                           |
|--------------------------------------|------------------------------|----------------|-------------------------------------------------|------------------------------------------------------------------------------------------|--------------------------------------------------------------------------------------------------------------------------------------------------------------------------------|-----------------------------------------------------------------------------------------------------------------------------------------------------------------------------------------------------------------------------------------|
| Malene Thygesen<br>et al. 2020       | Cohort<br>Study              | Denmark        | 814,689 children<br>aged from 5years            | Residential<br>address (NDVI)                                                            | Based on ICD-10, and always assessed by<br>child and adolescent psychiatrists.                                                                                                 | Children who in early life lived in residences<br>with low levels of green space (NDVI)<br>surrounding the residential addresses had an<br>increased risk of ADHD                                                                       |
| Markevych et al.<br>2018             | Cohort<br>Study              | German         | 66,823 children<br>aged from 10 to 14<br>years  | Residential<br>address (NDVI)                                                            | Based on ICD-10-GM F90 diagnosis by a<br>child/ adolescent psychiatrist,<br>neuropsychiatrician or psychotherapist                                                             | An increase of 0.1-unit in NDVI decreased the<br>relative risk of ADHD by a factor of 0.82 (95%<br>confidence interval: 0.68-0.98)                                                                                                      |
| Amoly et al., 2014                   | Cross-<br>sectional<br>study | Barcelona      | 2,111 school<br>children (7-10<br>years of age) | Time spent<br>playing in green<br>spaces; residential<br>surrounding<br>greenness (NDVI) | ADHD evaluated by Strengths and<br>Difficulties Questionnaires (SDQ) and<br>Diagnostic and Statistical Manual of Mental<br>Disorders, Fourth Edition (ADHD/DSM-IV)             | There exist significant and inverse associations<br>of ADHD symptoms scores with residential<br>greenness, but not with residential proximity to<br>major green space. School greenness was not<br>associated with ADHD symptoms.       |
| Geoffrey H<br>Donovan et al.<br>2019 | Cohort<br>Study              | New<br>Zealand | 49,923 children<br>(<18 years)                  | Residential<br>address (NDVI)                                                            | identify children with ADHD and to define<br>covariates. ADHD was defined according to<br>hospital diagnosis or pharmacy records (two<br>or more prescriptions for ADHD drugs) | Greenness exposure in early life (prenatal to age<br>2 years) was not protective against ADHD,<br>suggesting that exposure to the natural<br>environment might moderate the symptoms of<br>ADHD rather than preventing its development. |

|                           |                          |                               |                                                  |                                                     |                                                                                                                                                                                                 |                                                                                                                            |
|---------------------------|--------------------------|-------------------------------|--------------------------------------------------|-----------------------------------------------------|-------------------------------------------------------------------------------------------------------------------------------------------------------------------------------------------------|----------------------------------------------------------------------------------------------------------------------------|
| Bo-Yi Yang et al.<br>2019 | cross-sectional<br>study | China                         | 59,754 school<br>children (2-17<br>years of age) | green spaces<br>around schools<br>and kindergartens | Diagnostic and Statistical Manual of Mental<br>Disorders (Fourth Edition) scales were used<br>to measure ADHD symptoms (9 inattention<br>symptoms and 9 hyperactivity-impulsivity<br>symptoms). | There may be a beneficial association between<br>school-based greenness and ADHD symptoms<br>in Chinese children.          |
| Yuchi W et al.<br>2022    | Cohort<br>Study          | Metro<br>Vancouver,<br>Canada | 28,797 school<br>children                        | participants'<br>residential postal<br>codes        | Diagnosis from hospital records, physician<br>visits from MSP and prescriptions                                                                                                                 | Children living in greener neighborhoods had<br>substantially lower risk of ADHD compared to<br>lower greenspace exposure. |

---

Table S2. Characteristics of the study samples

| Characteristics                 | Subjects included in data analysis<br>(n = 66,678) | Subjects excluded due to missing information<br>(n = 6,806) | P      |
|---------------------------------|----------------------------------------------------|-------------------------------------------------------------|--------|
| Child sex                       |                                                    |                                                             | 0.15   |
| Boy                             | 36,425 (54.6)                                      | 3,779 (55.5)                                                |        |
| Girl                            | 30,253 (45.4)                                      | 3,027 (44.5)                                                |        |
| Child age (years)               | 3.53 (0.36)                                        | 3.49 (0.75)                                                 | <0.001 |
| Maternal age at childbirth      |                                                    |                                                             | <0.001 |
| ≤ 35 years                      | 60,923 (91.4)                                      | 6,315 (92.8)                                                |        |
| > 35 years                      | 5,755 (8.6)                                        | 491 (7.2)                                                   |        |
| Maternal education              |                                                    |                                                             | <0.001 |
| Junior high school or lower     | 10,251 (15.4)                                      | 1,743 (26.3)                                                |        |
| High school                     | 36,774 (55.2)                                      | 3,612 (54.4)                                                |        |
| College or higher               | 19,653 (29.5)                                      | 1,283 (19.3)                                                |        |
| Maternal employment             |                                                    |                                                             | <0.001 |
| No                              | 29,670 (44.5)                                      | 2,399 (37.2)                                                |        |
| Yes                             | 37,008 (55.5)                                      | 4,052 (62.8)                                                |        |
| Maternal history of comorbidity |                                                    |                                                             | <0.001 |
| No                              | 62,000 (93.0)                                      | 6,777 (99.6)                                                |        |
| Yes                             | 4,678 (7.0)                                        | 29 (0.4)                                                    |        |
| Family income (RMB/month)       |                                                    |                                                             | <0.001 |
| <5000                           | 5,831 (8.7)                                        | 1,226 (19.6)                                                |        |
| 5001–10 000                     | 14,492 (21.7)                                      | 1,748 (28.0)                                                |        |
| 10 001–20 000                   | 23,791 (35.7)                                      | 1,914 (30.7)                                                |        |

|                             |               |              |        |
|-----------------------------|---------------|--------------|--------|
| >20 000                     | 22,564 (33.8) | 1,353 (21.7) |        |
| Natural birth               |               |              | <0.001 |
| No                          | 27,619 (41.4) | 3,068 (45.1) |        |
| Yes                         | 39,059 (58.6) | 3,738 (54.9) |        |
| Feeding patterns            |               |              | <0.001 |
| Breast feeding              | 28,952 (43.4) | 2,540 (37.9) |        |
| Mixed feeding               | 30,755 (46.1) | 3,312 (49.4) |        |
| Artificial feeding          | 6,971 (10.5)  | 848 (12.7)   |        |
| Preterm Birth               |               |              | 0.19   |
| No                          | 61,439 (92.1) | 5,964 (91.7) |        |
| Yes                         | 5,239 (7.9)   | 542 (8.3)    |        |
| Environmental tobacco smoke |               |              | <0.001 |
| No                          | 48,914 (73.4) | 4,283 (65.3) |        |
| Yes                         | 17,764 (26.6) | 2,274 (34.7) |        |
| Febrile convulsion          |               |              | <0.001 |
| No                          | 58,464 (87.7) | 5,365 (83.2) |        |
| Yes                         | 8,214 (12.3)  | 1,083 (16.8) |        |
| Low birth weight            |               |              | <0.001 |
| No                          | 63,118 (94.7) | 5,188 (92.6) |        |
| Yes                         | 3,560 (5.3)   | 414 (7.4)    |        |

---

Note: There is no difference in the distribution between the sample and the excluded population.

Table S3: Summary of greenness indices and correlations between NDVI and EVI.

| Exposure Indices      | Min  | Max  | P25  | P50  | P75  | NDVI-250m | NDVI-500m | NDVI-1000m | EVI-250m | EVI-500m | EVI-1000m |
|-----------------------|------|------|------|------|------|-----------|-----------|------------|----------|----------|-----------|
| NDVI <sub>250m</sub>  | 0.16 | 0.67 | 0.24 | 0.28 | 0.33 | 1         | 0.97      | 0.87       | 0.95     | 0.92     | 0.84      |
| NDVI <sub>500m</sub>  | 0.16 | 0.67 | 0.24 | 0.28 | 0.33 |           | 1         | 0.94       | 0.92     | 0.96     | 0.91      |
| NDVI <sub>1000m</sub> | 0.19 | 0.64 | 0.24 | 0.28 | 0.32 |           |           | 1          | 0.81     | 0.89     | 0.97      |
| EVI <sub>250m</sub>   | 0.10 | 0.41 | 0.14 | 0.17 | 0.20 |           |           |            | 1        | 0.96     | 0.85      |
| EVI <sub>500m</sub>   | 0.10 | 0.41 | 0.14 | 0.17 | 0.21 |           |           |            |          | 1        | 0.93      |
| EVI <sub>1000m</sub>  | 0.12 | 0.39 | 0.14 | 0.17 | 0.20 |           |           |            |          |          | 1         |

Table S4. Factors at each hierarchical level in regression analysis

| Hierarchical<br>Level | Example of    | Example Variables                                                                                                                                                                                                                                                                 |
|-----------------------|---------------|-----------------------------------------------------------------------------------------------------------------------------------------------------------------------------------------------------------------------------------------------------------------------------------|
|                       | Hierarchical  |                                                                                                                                                                                                                                                                                   |
|                       | Level         |                                                                                                                                                                                                                                                                                   |
| Level-2               | School Level  | NDVI, EVI                                                                                                                                                                                                                                                                         |
| Level-1               | Student Level | Child sex, Child age, Maternal age at childbirth, Maternal education, Maternal employment, Maternal history of comorbidity, Family income, Natural birth, Feeding patterns, Preterm Birth, Environmental tobacco smoke, Febrile convulsion, Low birth weight, hyperactivity index |



Table S5. Odds ratios (OR) and 95% CI for the effect of baseline NDVI on hyperactivity behaviors in young children.

| Exposure             | Case (N, %)  | Crude model<br>OR (95% CI) | P-value | Nagelkerke<br>R square | Adjusted model <sup>a</sup><br>OR (95% CI) | P-value | Nagelkerke<br>R square |
|----------------------|--------------|----------------------------|---------|------------------------|--------------------------------------------|---------|------------------------|
| NDVI 250 m           |              |                            |         |                        |                                            |         |                        |
| Continuous (per IQR) | 1,183 (1.77) | 0.87 (0.79,0.95)           | <0.05   | 0.04                   | 0.91 (0.84,0.98)                           | <0.05   | 0.11                   |
| Q1                   | 327 (1.97)   |                            |         |                        |                                            |         |                        |
| Q2                   | 324 (1.94)   | 0.86 (0.71,1.04)           |         |                        | 1.01 (0.85,1.20)                           |         |                        |
| Q3                   | 262 (1.57)   | 0.64 (0.52,0.79)           |         |                        | 0.78 (0.65,0.94)                           |         |                        |
| Q4                   | 270 (1.62)   | 0.65 (0.52, 0.82)          |         |                        | 0.78 (0.65,0.94)                           |         |                        |
| <i>p</i> for trend   |              | <0.05                      |         |                        | <0.05                                      |         |                        |
| NDVI 500 m           |              |                            |         |                        |                                            |         |                        |
| Continuous (per IQR) | 1,183 (1.77) | 0.86 (0.78,0.94)           | <0.001  | 0.04                   | 0.89 (0.83,0.96)                           | <0.001  | 0.11                   |
| Q1                   | 333 (2.02)   |                            |         |                        |                                            |         |                        |
| Q2                   | 295 (1.76)   | 0.74 (0.61,0.89)           |         |                        | 0.89 (0.74,1.06)                           |         |                        |
| Q3                   | 295 (1.77)   | 0.69 (0.56,0.86)           |         |                        | 0.83 (0.69,1.00)                           |         |                        |
| Q4                   | 260 (1.56)   | 0.60 (0.48,0.75)           |         |                        | 0.71 (0.58,0.86)                           |         |                        |
| <i>p</i> for trend   |              | <0.05                      |         |                        | <0.05                                      |         |                        |
| NDVI 1000 m          |              |                            |         |                        |                                            |         |                        |
| Continuous (per IQR) | 1,183 (1.77) | 0.83 (0.75,0.91)           | <0.001  | 0.04                   | 0.87 (0.81,0.94)                           | <0.001  | 0.11                   |

|                    |            |                  |                  |
|--------------------|------------|------------------|------------------|
| Q1                 | 324 (1.95) |                  |                  |
| Q2                 | 317 (1.90) | 0.85 (0.7,1.03)  | 0.96 (0.81,1.14) |
| Q3                 | 272 (1.64) | 0.65 (0.51,0.81) | 0.81 (0.67,0.98) |
| Q4                 | 270 (1.61) | 0.63 (0.5,0.80)  | 0.71 (0.59,0.86) |
| <i>p</i> for trend |            | <0.05            | <0.05            |

---

Table S6.  $\beta$  and 95% CI for the effect of baseline NDVI on hyperactivity index.

| Exposure             | Case (N, %)  | Crude model<br>$\beta$ (95% CI) | Adjusted model <sup>a</sup><br>$\beta$ (95% CI) |
|----------------------|--------------|---------------------------------|-------------------------------------------------|
| NDVI 250 m           |              |                                 |                                                 |
| Continuous (per IQR) | 1,183 (1.77) | -0.00237 (-0.00384, -0.00091)   | -0.00205 (-0.00337, -0.00072)                   |
| Q1                   | 327 (1.97)   |                                 |                                                 |
| Q2                   | 324 (1.94)   | -0.00257 (-0.00591, 0.00076)    | -0.00031 (-0.00342, 0.00281)                    |
| Q3                   | 262 (1.57)   | -0.00759 (-0.01109, -0.00409)   | -0.00502 (-0.00822, -0.00181)                   |
| Q4                   | 270 (1.62)   | -0.0073 (-0.01095, -0.00365)    | -0.00539 (-0.00867, -0.00211)                   |
| <i>p</i> for trend   |              | 0.24                            | <0.05                                           |
| NDVI 500 m           |              |                                 |                                                 |
| Continuous (per IQR) | 1,183 (1.77) | -0.00256 (-0.00398, -0.00114)   | -0.0023 (-0.00358, -0.00103)                    |
| Q1                   | 333 (2.02)   |                                 |                                                 |
| Q2                   | 295 (1.76)   | -0.00548 (-0.00879, -0.00217)   | -0.00279 (-0.00589, 0.00031)                    |
| Q3                   | 295 (1.77)   | -0.00631 (-0.00986, -0.00277)   | -0.0041 (-0.00731, -0.00088)                    |
| Q4                   | 260 (1.56)   | -0.00885 (-0.01254, -0.00515)   | -0.00707 (-0.01037, -0.00378)                   |
| <i>p</i> for trend   |              | 0.23                            | <0.05                                           |
| NDVI 1000 m          |              |                                 |                                                 |

|                      |              |                               |                               |
|----------------------|--------------|-------------------------------|-------------------------------|
| Continuous (per IQR) | 1,183 (1.77) | -0.00312 (-0.00451,-0.00173)  | -0.00276 (-0.00398,-0.00154)  |
| Q1                   | 324 (1.95)   |                               |                               |
| Q2                   | 317 (1.90)   | -0.00268 (-0.00605,7e-04)     | -0.00117 (-0.00429,0.00195)   |
| Q3                   | 272 (1.64)   | -0.00752 (-0.01115, -0.00389) | -0.00477 (-0.00801, -0.00152) |
| Q4                   | 270 (1.61)   | -0.00808 (-0.01185, -0.0043)  | -0.00711 (-0.01042, -0.0038)  |
| <i>p</i> for trend   |              | 0.15                          | <0.05                         |

---

a: Adjusting for child's sex, age, highest level of maternal education, maternal employment, age at childbirth, history of comorbidity, family income monthly, natural birth, feeding patterns, preterm birth, febrile convulsion, low birth weight and ETS.

Table S7. Odds ratios (OR) and 95% CI for the effect of baseline EVI on hyperactivity behaviors.

| Exposure             | Case (N, %)  | Crude model<br>OR (95% CI) | Adjusted model <sup>a</sup><br>OR (95% CI) |
|----------------------|--------------|----------------------------|--------------------------------------------|
| EVI 250 m            |              |                            |                                            |
| Continuous (per IQR) | 1,183 (1.77) | 0.95 (0.87,1.04)           | 0.90 (0.83,0.98)                           |
| Q1                   | 283 (1.70)   |                            |                                            |
| Q2                   | 317 (1.91)   | 1.13 (0.94,1.37)           | 1.07 (0.90,1.28)                           |
| Q3                   | 303 (1.82)   | 1.02 (0.83,1.25)           | 0.99 (0.82,1.19)                           |
| Q4                   | 280 (1.67)   | 0.91 (0.74,1.12)           | 0.80 (0.66,0.97)                           |
| <i>p</i> for trend   |              | 0.24                       | <0.05                                      |
| EVI 500 m            |              |                            |                                            |
| Continuous (per IQR) | 1,183 (1.77) | 0.93 (0.85,1.03)           | 0.87 (0.80,0.95)                           |
| Q1                   | 290 (1.74)   |                            |                                            |
| Q2                   | 291 (1.75)   | 0.96 (0.79,1.17)           | 1.05 (0.88,1.25)                           |
| Q3                   | 336 (2.01)   | 1.07 (0.88,1.31)           | 1.03 (0.86,1.23)                           |
| Q4                   | 266 (1.59)   | 0.84 (0.68,1.04)           | 0.75 (0.63,0.91)                           |
| <i>p</i> for trend   |              | 0.23                       | <0.05                                      |
| EVI 1000 m           |              |                            |                                            |
| Continuous (per IQR) | 1,183 (1.77) | 0.91 (0.83,1.00)           | 0.85 (0.78,0.92)                           |

|                    |            |                  |                  |
|--------------------|------------|------------------|------------------|
| Q1                 | 280 (1.70) |                  |                  |
| Q2                 | 334 (1.98) | 1.09 (0.90,1.31) | 1.04 (0.87,1.25) |
| Q3                 | 276 (1.66) | 0.86 (0.69,1.06) | 0.81 (0.67,0.99) |
| Q4                 | 293 (1.76) | 0.91 (0.74,1.13) | 0.76 (0.62,0.92) |
| <i>p</i> for trend |            | 0.15             | <0.05            |

---

a: Adjusting for child's sex, age, highest level of maternal education, maternal employment, age at childbirth, history of comorbidity, family income monthly, natural birth, feeding patterns, preterm birth, febrile convulsion, low birth weight and ETS.

Table S8. Odds ratios (OR) and 95% CI for the effect of baseline NDVI on hyperactivity behaviors additionally adjusted NO<sub>2</sub>.

| Exposure             | Case (N, %)  | Adjusted model <sup>a</sup><br>OR (95% CI) |
|----------------------|--------------|--------------------------------------------|
| NDVI 250 m           |              |                                            |
| Continuous (per IQR) | 1,183 (1.77) | 0.92 (0.85,0.99)                           |
| Q1                   | 327 (1.97)   |                                            |
| Q2                   | 324 (1.94)   | 1.01 (0.85,1.20)                           |
| Q3                   | 262 (1.57)   | 0.79 (0.66,0.95)                           |
| Q4                   | 270 (1.62)   | 0.81 (0.67,0.97)                           |
| <i>p</i> for trend   |              | <0.05                                      |
| NDVI 500 m           |              |                                            |
| Continuous (per IQR) | 1,183 (1.77) | 0.90 (0.84,0.97)                           |
| Q1                   | 333 (2.02)   |                                            |
| Q2                   | 295 (1.76)   | 0.87 (0.73,1.04)                           |
| Q3                   | 295 (1.77)   | 0.86 (0.72,1.03)                           |
| Q4                   | 260 (1.56)   | 0.73 (0.60,0.88)                           |
| <i>p</i> for trend   |              | <0.05                                      |
| NDVI 1000 m          |              |                                            |
| Continuous (per IQR) | 1,183 (1.77) | 0.88 (0.81,0.94)                           |

|                    |            |                  |
|--------------------|------------|------------------|
| Q1                 | 324 (1.95) |                  |
| Q2                 | 317 (1.90) | 0.97 (0.82,1.15) |
| Q3                 | 272 (1.64) | 0.83 (0.69,0.99) |
| Q4                 | 270 (1.61) | 0.72 (0.60,0.87) |
| <i>p</i> for trend |            | <0.05            |

---

a: Adjusting for child’s sex, age, highest level of maternal education, maternal employment, age at childbirth, history of comorbidity, family income monthly, natural birth, feeding patterns, preterm birth, febrile convulsion, low birth weight, ETS and NO<sub>2</sub>
